# Supplementary material
Source: Springer Nature journal article supplement (https://www.springermedizin.de/resource/supplementary/12906_2012_1265_MOESM1_ESM.pdf/9520200)
Supplement: MOESM1 [file 9520200]

## Supporting materials

**Table 1 PCR primers used in this study**

| Gene               | Forward primer                 | Reverse primer                  | Gen Bank<br>Accession No. | Length<br>(bp) |
|--------------------|--------------------------------|---------------------------------|---------------------------|----------------|
| CD68               | 5'-TGTACCTGACCCAGGGTGGAA-3'    | 5'-GAATCCAAAGGTAAGCTGTCCGTAA-3' | NM_001031638              | 140            |
| TNF- $\alpha$      | 5'-GGCAGCCTTGTCCTTGAAGAG-3'    | 5'-GTAGCCCACGTCGTAGCAAACC-3'    | X6659                     | 171            |
| IL-1 $\beta$       | 5'-GCTGTGGCAGCTACCTATGTCTTG-3' | 5'-AGGTCGTCATCATCCCACGAG-3'     | NM_031512                 | 120            |
| $\alpha$ -SMA      | 5'-CGAGAGGACGTTGTAGCATAGAG-3'  | 5'-GGGCATCCACGAAACCA-3'         | BI282702                  | 85             |
| COL-1( $\alpha$ )1 | 5'-ACTCAGCCGCTGTGCCTCA-3'      | 5'-GGAGGCCTCGGTGGACATTA-3'      | NM_007742                 | 183            |
| 18SrRNA            | 5'-GTAACCCGTTGAACCCATT-3'      | 5'-CCATCCAATCGGTAGTAGCG-3'      | X0117                     | 151            |

**Table 2 Ratio of liver, spleen, heart, lung, kidney and brain weight/body weight in DMN-induced rat liver fibrosis (2-1).**

| Group (number)            | liver/ body %   | spleen/body %               | heart/body%                 |
|---------------------------|-----------------|-----------------------------|-----------------------------|
| 2-week normal (3)         | 3.42 $\pm$ 0.29 | 2.70 $\pm$ 0.49 $^{\Delta}$ | 2.80 $\pm$ 0.36             |
| 2-week DMN (3)            | 4.25 $\pm$ 0.26 | 4.25 $\pm$ 0.33 $^{\Delta}$ | 2.79 $\pm$ 0.04 $^{\Delta}$ |
| 4-week normal (7)         | 3.66 $\pm$ 0.15 | 2.15 $\pm$ 0.37 $^{\Delta}$ | 2.97 $\pm$ 0.18 $^{\Delta}$ |
| DMN-water (5)             | 2.91 $\pm$ 0.66 | 6.78 $\pm$ 1.07 $^{\Delta}$ | 3.59 $\pm$ 0.48 $^{\Delta}$ |
| DMN-PF (7)                | 3.08 $\pm$ 0.44 | 5.38 $\pm$ 0.71 $^{\Delta}$ | 3.15 $\pm$ 0.30 $^{\Delta}$ |
| DMN-GdCl <sub>3</sub> (6) | 2.58 $\pm$ 0.09 | 4.86 $\pm$ 1.81 $^{\Delta}$ | 3.46 $\pm$ 0.49             |

**Ratio of liver, spleen, heart, lung, kidney and brain weight/body weight in DMN-induced liver fibrosis in rats (2-1)**

| group(number)             | lung/body%                  | kidney/body%    | brain/body%                |
|---------------------------|-----------------------------|-----------------|----------------------------|
| 2 weeks normal (3)        | 3.76 $\pm$ 0.55 $^{\Delta}$ | 5.80 $\pm$ 0.25 | 5.21 $\pm$ 0.25            |
| 2weeks DMN (3)            | 5.18 $\pm$ 0.31             | 7.58 $\pm$ 0.30 | 6.10 $\pm$ 0.02            |
| 4 weeks normal (7)        | 3.66 $\pm$ 0.17 $^{\Delta}$ | 6.00 $\pm$ 0.49 | 4.29 $\pm$ 0.30 $^{\star}$ |
| DMN-water (5)             | 5.22 $\pm$ 0.54             | 7.16 $\pm$ 0.98 | 5.97 $\pm$ 0.36            |
| DMN-PF (7)                | 4.82 $\pm$ 0.42             | 6.99 $\pm$ 0.46 | 5.66 $\pm$ 0.66            |
| DMN-GdCl <sub>3</sub> (6) | 5.83 $\pm$ 0.69 $^{\Delta}$ | 9.07 $\pm$ 1.80 | 6.23 $\pm$ 0.98            |

$^{\Delta}$  $p$ <0.05 versus the same period in 2-week DMN rats;  $^{\Delta}$  $p$ <0.05 versus the same period in

DMN-water. Bonferroni's multiple comparison tests were used for group comparisons in ratio of spleen/body, heart/body, lung/body.

$^{\star}$  $p$ <0.05 versus the same period in 2-week DMN rats;  $^{\star}$  $p$ <0.05 versus the same period in

DMN-water rats. Kruskal-Wallis test were used for group comparisons in ratio of liver/body, kidney/body, and brain/body.

**Table3 Effects of PF on fibrotic grade and Hyp content in DMN-induced rat liver fibrosis**

| Group                 | <i>n</i> | Hyp content<br>ug/g( $\bar{x} \pm s$ ) | Fibrotic stage |   |    |     |    | Ridit value         |
|-----------------------|----------|----------------------------------------|----------------|---|----|-----|----|---------------------|
|                       |          |                                        | 0              | I | II | III | IV |                     |
| Normal                | 10       | 150.36±30.40 <sup>★</sup>              | 10             | 0 | 0  | 0   | 0  | 0.1613 <sup>★</sup> |
| 2-week DMN            | 3        | 315.43±17.24                           | 0              | 0 | 2  | 1   | 0  | 0.4570              |
| DMN-water             | 5        | 812.09±163.65                          | 0              | 0 | 0  | 1   | 4  | 0.8161              |
| DMN-PF                | 7        | 434.17±87.94 <sup>★</sup>              | 0              | 0 | 2  | 5   | 0  | 0.5368 <sup>★</sup> |
| DMN-GdCl <sub>3</sub> | 6        | 707.73±144.85                          | 0              | 0 | 0  | 2   | 4  | 0.7796              |

Grades 0, normal; 1, very slight; 2, slight; 3, moderate; and 4, severe; data as numbers of animals with each fibrotic grade; <sup>★</sup> $p < 0.05$  vs DMN-water rats; <sup>☆</sup> $p < 0.05$  vs 2-week DMN rats. Kruskal-Wallis test were used for group comparisons in Hyp content and ridit analysis.
